# Three-Dimensional Echocardiographic Evaluation of Longitudinal and Non-Longitudinal Components of Right Ventricular Contraction Results from the World Alliance of Societies of Echocardiography Study

Juan I. Cotella MD<sup>1</sup>, Attila Kovacs MD<sup>2</sup>, PhD, Karima Addetia MD<sup>1</sup>, Alexandra Fabian MD<sup>2</sup>, Federico M. Asch MD<sup>3</sup>, Roberto M. Lang MD<sup>1</sup>

On behalf of the WASE Investigators\*

<sup>1</sup>University of Chicago, Chicago, IL; <sup>2</sup>Semmelweis University, Heart and Vascular Center, Budapest, Hungary; <sup>3</sup>MedStar Health Research Institute, Washington, DC

---

Short title: **Normal Values of Longitudinal and Non-Longitudinal RV Deformation**

Word count: 3,685

**Disclosures:** AK serves as the Chief Medical Officer of Argus Cognitive, Inc., and received financial compensation for his work, outside the submitted paper. No direct conflicts of Interest related to this study have been reported by other authors. All authors have been involved in the design of the WASE study, patient enrollment and/or data analysis and all have critically reviewed and approved the final manuscript prior to submission. A full list of WASE investigators is provided at the end of the manuscript.

**Correspondence to:**

Roberto M Lang, MD  
The University of Chicago Medicine  
5758 S. Maryland Avenue, MC 9067, DCAM 5509  
Chicago, IL 60637

## **Abstract**

*Background:* Right ventricular (RV) functional assessment is mainly limited to its longitudinal component. However, due to the complex orientation of the myofibers, the RV contraction involves coordinated motion along multiple planes. Recently developed 3-dimensional echocardiography (3DE) software has enabled the separate assessment of the non-longitudinal components of RV systolic function and their relative contribution to RV performance. The aims of this study were 1) to establish normal values for 3D-derived longitudinal, radial, and anteroposterior RV ejection fraction (LEF, REF, AEF respectively) and their relative contributions to global RVEF, 2) to calculate 3D RV strain normal values and, 3) to determine sex, age and race related differences in these parameters in a large group of normal subjects (WASE study)

*Methods:* 1043 healthy adult subjects prospectively enrolled at 17 centers in 15 countries were used in this study. 3DE RV wide-angle datasets were analyzed to generate a 3D mesh model of the RV cavity (TomTec). Then, dedicated software (ReVISION) was used to analyze RV motion along the three main anatomical planes and the ejection fraction (EF) values corresponding to each plane were identified as LEF, REF, and AEF. Relative contributions were determined by dividing each EF component by the global RVEF. RV strain analysis included longitudinal, circumferential, and global area strains (GLS, GCS and GAS, respectively). Results were categorized by sex, age (18-40, 41-65 and >65 years), and race.

*Results:* Absolute REF, AEF, LEF and global RVEF were higher in women than in men ( $p < .001$ ). With aging, both sexes exhibited a decline in all the determinants of longitudinal shortening ( $p < .001$ ). In elderly women, the lower global RVEF was partially compensated by an increase in radial shortening. Both Black men and women showed lower RVEF, and GAS values compared to White and Asian subjects of the same sex ( $p < .001$ ). Black men showed significantly higher REF/RVEF and lower LEF/RVEF compared to Asian and White men. These differences in RV contraction patterns across races were not present in women.

*Conclusion:* 3DE evaluation of the non-longitudinal components of RV contraction provides additional information regarding RV physiology, including sex, age and race - related differences in RV contraction patterns that may prove useful in disease states involving the RV.

*Keywords:* right ventricle, three-dimensional echocardiography, non-longitudinal

## **Abbreviations**

American Society of Echocardiography (ASE)

Body surface area (BSA)

Cardiovascular magnetic resonance (CMR)

European Association of Cardiovascular Imaging (EACVI)

End-diastolic volume index (EDVi)

Ejection Fraction

Fractional area change (FAC)

Anteroposterior Ejection Fraction (AEF)

Ejection fraction (EF)

Global area strain (GAS)

Global circumferential strain (GCS)

Global longitudinal strain (GLS)

Longitudinal Ejection Fraction (LEF)

Mitral regurgitation (MR)

Radial Ejection Fraction (REF)

Right ventricular (RV)

Tricuspid annular peak systolic excursion (TAPSE)

Transthoracic Echocardiography (TTE)

Two-dimensional Echocardiography (2DE)

Three-dimensional Echocardiography (3DE)

World Alliance Societies of Echocardiography (WASE)

## INTRODUCTION

Right ventricular (RV) function has a prognostic role in several cardiovascular diseases<sup>1-4</sup>. Since these conditions are frequently associated with RV remodeling and dysfunction, a comprehensive assessment of this chamber has become pivotal in cardiovascular evaluation. In daily clinical practice, assessment of RV morphology and systolic function is predominantly performed using transthoracic echocardiography (TTE) and is based on the interpretation of images obtained from multiple transducer positions with two-dimensional (2D) measurements, such as: basal and mid-ventricular diameters, fractional area change (FAC), tricuspid annular plane systolic excursion (TAPSE), tissue Doppler tricuspid annular velocity, and RV free-wall strain (RV FWS).

However, the right ventricle has a complex, crescent-shaped anatomy, combined with an intricate contraction pattern. Due to the different orientation of its subepicardial (circumferential) and subendocardial (longitudinal) myocardial fibers<sup>5</sup>, RV contraction occurs along the longitudinal, radial and anteroposterior directions. As a result, the use of simple 2D echocardiographic (2DE) techniques might be inadequate to accurately evaluate RV systolic performance, as they provide information limited to the in-plane components of RV contraction.

Three-dimensional echocardiography (3DE) allows the evaluation of the entire right ventricle from a single acquisition. Through the generation, manipulation and decomposition of 3DE dynamic surface rendering models of the right ventricle, software has been recently developed to enable the separate assessment of the longitudinal and non-longitudinal components of RV systolic function and quantify their relative contributions to global RV performance<sup>6</sup>. However, little is known about what these components look like in the normal population, and therefore there is no reference basis to detect abnormalities.

Accordingly, the aims of this study were 1) to establish normal values for longitudinal, radial, and anteroposterior motion components of RV deformation and determine their relative contributions to global RV performance in a large group of normal subjects, and 2) to examine sex, age, and race related differences in these normal values. To achieve this goal, we used the population from the World Alliance Societies of Echocardiography (WASE) Study, which represents the largest collection of normal 2DE and 3DE TTE images.

## METHODS

### Study Design and Population

The WASE Study rationale was described in detail elsewhere <sup>7, 8</sup>. A comprehensive 2D and 3D TTE examination was performed in all study subjects using commercially available ultrasound imaging systems (GE, Philips, and Siemens). Image acquisition followed a standard protocol established by ASE/EACVI guidelines and data analyzed by the two WASE core laboratories (University of Chicago and MedStar Health Research Institute) <sup>9</sup>.

### Image Acquisition and Analysis

Wide-angle 3DE full-volume RV datasets were acquired with the patient in the left decubitus position over 4-6 cardiac cycles during suspended respiration from the RV-focused view, while carefully avoiding stitching and drop-out artifacts. Data was digitally stored and analyzed offline at the 3DE Core Lab (University of Chicago) using dedicated vendor-independent software (Image Arena; “4D RV-Function”, TOMTEC, Unterschleissheim, Germany), previously validated against cardiac magnetic resonance (CMR) reference <sup>9, 10</sup>. 3DE datasets were deemed adequate for analysis if all walls were visible throughout the cardiac cycle. A minimum frame rate of 15 volumes per second was required for the software to perform the analysis.

Auto-segmentation technology with the help of specific manually identified landmarks allowed the 3D RV dataset to be displayed in both the long and short-axis cut-planes with an initial endocardial border contour suggestion. End-diastole was automatically identified as the time point in which the RV cavity was the largest, while end-systole was identified as the time-point when the cavity was the smallest. Afterwards, the user could manually adjust the proposed end-diastolic and end-systolic endocardial border contours to optimize dynamic tracking throughout the cardiac cycle. Once this step was completed, the program generated and rendered a 3D RV surface model.

### Decomposition of the RV motion

**Figure 1** illustrates the workflow for the decomposition of RV systolic function into its different contractile components.

#### *1. 3D reconstruction and mesh model import*

First, the 3D RV models (formulated as a series of polygon meshes) were exported volume-by-volume throughout the cardiac cycle from the TOMTEC software. Then, these meshes were

imported to ReVISION software (Right Ventricular Separate wall motion quantification; Argus Cognitive, Lebanon, New Hampshire) <sup>6</sup> used in the next steps.

## *2. Preprocessing and standardization of the 3D mesh orientation*

To standardize the orientation and further decomposition of the RV contraction, the 3D RV models were aligned to a reference mesh by methodology described elsewhere <sup>11</sup> aiming to define three anatomically relevant, orthogonal axes of the RV: longitudinal, radial and anteroposterior.

## *3. Movement decomposition and calculation of 3D RV EF*

Initially, 3D RV end-diastolic volume indexed (EDVi) to body surface area (BSA) and global 3D RVEF were calculated. Once the relevant axes were defined, the wall motion of the 3D RV model was decomposed in a vertex-based manner. This step transformed the original 3D polygon mesh model into several series of meshes, each corresponding to a decomposition type, allowing the isolation and independent assessment of the magnitude of longitudinal, radial or anteroposterior motions.

By decomposing the model's motion along the predefined orthogonal axes, the software was capable to separately quantify the RV volume changes along each direction. The volumes of the models related to only one motion direction were calculated at each time frame using the signed tetrahedron method <sup>6</sup>. The corresponding EF value for each axis was defined as longitudinal, radial and anteroposterior EF (LEF, REF and AEF, respectively). The relative and individual contribution of LEF, REF and AEF to the global RV performance, were calculated as ratios, dividing each axis EF by the global RVEF (LEF/RVEF, REF/RVEF and AEF/RVEF respectively). Importantly, the absolute volume change generated by the software corresponds to the aggregated contribution of the three motion components. This composition is not additive, and consequently, the sum of the decomposed volume changes is not equal to the global RV volume change <sup>12</sup>.

## *4. Calculation of 3D RV Strain*

Finally, 3D RV global longitudinal strain (GLS) and global circumferential strain (GCS), were calculated by the changes in predefined longitudinal and circumferential contour lengths referenced to the corresponding end-diastolic contour length.

Briefly, to obtain 3D RV GLS, 45 longitudinally oriented contours were generated by connecting the apex and predefined vertices of the base through specific equidistant vertices at the middle

section by fitting geodesic lines (the shortest path between two points on a curved surface). This method ensures that the longitudes are evenly distributed on the surface of the mesh.

Ultimately, the quantification of the change in the length of each RV longitudinal contour throughout the entire cardiac cycle allowed the calculation of the 3D RV GLS.

For the calculation of 3D RV GCS, the pulmonary and tricuspid annular planes were excluded. Then, 15 circumferential contours were created by slicing horizontally the 3D RV mesh model at equal distances along the longitudinal axis. After generating a set of circumferential contours, we were able to quantify the change in their positions at later time instants and to provide 3D RV GCS values.

Additionally, 3D RV global area strain (GAS) was defined as the percentage change in the endocardial area of the 3D models. Further details about the analytical method of ReVISION software have been documented elsewhere <sup>11</sup>.

### Statistical Analysis

All data are presented as the mean  $\pm$  standard deviation (SD). Group differences were evaluated using ANOVA and unpaired two-tailed student's t-tests. Statistical significance was defined as  $p < 0.05$ . Normal ranges for each parameter were defined as upper and lower limits using 2.5th and 97.5th percentile values from the relevant group. This is in accordance with the definition of "normal" as falling within 95% of the normal population, with the remaining 5% being distributed equally between the two tails of the distribution, irrespective of whether it is Gaussian. Pearson or Spearman correlation tests were applied, as appropriate. In addition, multivariable linear regression analyses were performed to identify independent associations between the decomposed RV metrics with demographic, anthropometric, basic hemodynamic, and LV functional parameters. In order to add race, we dichotomized our cohort accordingly, analyzing White (yes/no), Black (yes/no) and Asian (yes/no) races as separate variables in each model to avoid collinearity.

## **RESULTS**

Out of the initial cohort of 2262 subjects from the WASE Study, 2007 had 3D RV datasets available in the format suitable for measurement. Of these, 1043 (52%) had adequate image quality. Exclusion criteria included: 1) low frame rates ( $< 15$  volumes per second), 2) presence of stitch artifact, 3) excessive drop-out of the anterior RV free wall, and 4) incomplete data capture with the lateral free-wall or the RV apex being cut-off from the pyramidal volume, suggesting that data was collected from the 4-chamber instead of the RV-focused view. **Table 1** shows the

basic anthropometric and demographic data of the study population. Men and women were equally distributed. Most of the population was white (47%) followed by Asians (36%). Subjects were distributed in six sub-groups according to age and sex: 18-40 years (234 men, 199 women), 41-65 years (194 men, 197 women) and >65 years (105 men and 114 women). Upper and lower limits of normal (ULN and LLN, respectively) for global and direction-specific RV functional parameters are provided in [Table 2](#).

### *1. Sex-related differences*

[Table 3](#) shows the 3D RV morphological and functional parameters of the total study population and separated by sex. RVEDVi was significantly higher in men than in women ( $p < 0.001$ ). Global RVEF and absolute REF, AEF, LEF values were higher in women than in men ( $p < 0.001$ ). However, the relative contribution of each of the individual components to the global RVEF was similar in both sexes. While GLS and GAS were significantly higher in women than in men, GCS showed no differences between sexes.

### *2. Age-related differences*

[Table 4](#) shows the age-related differences in the components of 3D RV systolic function in both men and women. There were no significant differences in RVEDVi between age groups. Both sexes exhibited a decline in longitudinal shortening (i.e., LEF, LEF/RVEF, and GLS,  $p < .001$ ) with increasing age. In women, this reduction in LEF/RVEF led to a lower global RVEF ( $p < 0.001$ ), which was incompletely compensated by an increase in REF/RVEF.

### *3. Race-related differences*

BSA and RVEDVi were significantly smaller in Asian compared to black and white subjects ([Table 5](#)). Both black men and women showed lower RVEF, and GAS values compared to white and Asian subjects of the same sex ( $p < 0.001$ ). Black men showed a distinctive RV mechanical pattern, consistent of significantly higher REF/RVEF and lower LEF/RVEF values, when compared to Asian and white men. White men showed higher LEF/RVEF than both black and Asian men ( $p < 0.001$ ). Of note, these differences in RV contraction patterns across races were not significant in women.

### *4. Association with 3D LV functional parameters and independent predictors of the contractile patterns*

Correlations between LEF, REF, AEF and basic demographic, anthropometric, hemodynamic and LV functional parameters are summarized in [Supplementary Table 1](#). Notably, three-dimensional echo-derived LV EF correlated weakly with 3D RV EF ( $r=0.161$ ,  $p < 0.001$ ), LEF



( $r=0.112$ ,  $p=0.001$ ), and with AEF ( $r=0.126$ ,  $p<0.001$ ). 3D LV GLS also correlated weakly with 3D RV EF ( $r= -0.158$ ,  $p<0.001$ ), 3D RV GLS ( $r=0.166$ ,  $p<0.001$ ) and LEF ( $r= -0.238$ ,  $p<0.001$ ). Results of multivariable linear regression analyses are shown in [Supplementary Tables 2,3 and 4](#). Beyond age, sex, and LVEF, white and black races were independent predictors of LEF, whereas sex, LVEF, and white and black races were independent predictors of AEF.

## DISCUSSION

The main findings of this study are: 1) Smaller RVEDVi and higher RV EF values, with significantly higher GLS and GAS contributions are seen in women compared to men; 2) There is a significant decrease in global RV EF in older subjects of both sexes, mainly driven by a reduction in the longitudinal component of RV contraction; 3) Only in women, this reduction of RVEF with increasing age is partially compensated by an increase in REF; 4) The effects of race on RV contraction patterns are particularly significant in men; 5) While black subjects have significantly higher radial and lower longitudinal contributions to global RVEF, white men have higher values of longitudinal and anteroposterior components.

### *Rationale for the evaluation of non-longitudinal components of RV contraction*

The RV myo-architecture and contraction are extremely complex. While the septum is characterized by oblique longitudinal and spiral fibers, the RV free wall contains predominantly transversal myofibers<sup>13</sup>. Due to this unique spatial anatomical disposition of myofibers, RV contraction is the result of the combination of three distinctive contractile patterns i.e., shortening along the longitudinal axis, radial contraction of the free wall (“bellows effect”), and anteroposterior shortening as a result of left ventricular (LV) contraction.

However, all 2DE techniques used for the evaluation of RV contraction (i.e. TAPSE and S wave tissue Doppler velocity) provide information on regional longitudinal, rather than global RV function. Although 2DE RV FWS has the advantage of being a more sensitive indicator of subclinical impairment of RV contraction than conventional 2DE measurements<sup>2, 14, 15</sup>, it has been reported that in situations where RV function is not predominantly affected by reduced longitudinal contraction or where global RV function remains preserved despite decreased longitudinal motion, the sole use of 2DE RV FWS might be insufficient to characterize RV systolic function<sup>16, 17</sup>.

Whenever examiners are familiar with 3DE imaging and image quality is acceptable, it should be used the evaluation of RV function. This is supported by previous reports showing that 3DE assessment of RV volumes, EF and GLS are feasible and reproducible<sup>18</sup>, and provides additional prognostic information in patients with diverse cardiac conditions<sup>19,20</sup>. Moreover, constant advances and development of matrix-array transducers with higher spatial and temporal resolutions has made possible the development of dedicated software for 3DE deconstruction of RV systolic function in all its motion components. The software used in our study has previously shown excellent intra- and inter-observer reproducibility as well as a robust correlation with currently available echocardiographic software and a modest correlation with CMR<sup>11,21</sup>. These findings and the existing evidence about the clinical and prognostic value of the measurements performed in our study, support the feasibility and potential role of this approach in enhancing our understanding of the mechanisms of RV adaptation or maladaptation to pathologic conditions.

#### *Evidence about the clinical utility of the different components of RV systolic function*

The prognostic value of the parameters included in our study has been described by Kitano et al. who showed that 3D RV GCS, GLS and GAS were significantly associated with cardiac death, ventricular tachyarrhythmia, or heart failure hospitalization at 20 months of follow-up in a cohort of patient with diverse cardiac diseases<sup>21</sup>. Moreover, these findings persisted after adjusting for factors like age, renal function, LVEF and average mitral E/e'. Kaplan-Meier analysis showed that median values of 3D RV GCS, GLS and GAS stratified these patients by survival rates<sup>21</sup>. Tolvaj et al have described the association between reduced RV GCS and significantly increased risk of mortality, even in scenarios where LV GLS is preserved<sup>22</sup>. Interestingly, 3D RV GAS was shown to be a better prognostic marker than 3DE RV GLS or GCS, most likely due to the fact that the information provided by GAS corresponds to an multiplanar evaluation of RV contraction and is not limited to either the longitudinal or circumferential directions as are GLS and GCS<sup>21</sup>.

It is key to understand that the RV adaptive mechanisms vary according to the underlying pathophysiological process. These different mechanical responses can be identified only through the separate assessment of the multiple components of RV contraction. This approach

has allowed to describe distinctive RV mechanical adaptations in different populations<sup>21, 23-25</sup>, including heart transplant recipients<sup>26</sup>, congenital cardiomyopathies<sup>27</sup>, and elite athletes<sup>28</sup>.

In a large cohort of patients with mildly and moderately reduced LVEF, Surkova et al. demonstrated that despite initially reduced LEF and AEF, REF increased, leading to maintain the global RV performance. Once the contribution of REF decreased, the global RV EF became severely reduced<sup>29</sup>. Notably, in patients with preserved RV EF (>45%), the AEF component has shown to be a significant and independent predictor of outcome after a median of 6.7 years follow-up<sup>29</sup>. These findings raise the question about the role of the evaluation of RV contraction beyond the longitudinal shortening in patients with LV dysfunction, considering that identifying the decrease in other motion components could be useful as early markers or RV dysfunction, follow-up parameters or indicators for treatment escalation. Accordingly, in a meta-analysis of more than 1,900 patients, Sayour et al. have elegantly demonstrated that 3D RVEF has a stronger association with adverse cardiopulmonary outcomes than conventional RV functional indices, namely TAPSE, FAC and RV FWS<sup>30</sup>.

Severe mitral regurgitation (MR) represents one of the most frequent indications for valve surgery, and its progression leads to adaptive (and maladaptive) changes in both left and right ventricles. Due to its broadly recognized prognostic implications, timely diagnosis and appropriate risk stratification represent a major clinical need<sup>31</sup>. Accordingly, Tokodi et al. reported that in patients with severe primary MR and RV EF > 45%, there was a reduction in REF and a predominant contribution of LEF to the global RV contraction. However, in the immediate post-operative period, this contractile RV pattern inverted, and REF prevailed over LEF. Interestingly, after 6 months, the contribution of both components had equalized<sup>24</sup>.

These reports reinforce the notion that the impact of different hemodynamic conditions on RV systolic function might be overlooked, if the evaluation of RV contraction is only performed using conventional parameters of longitudinal deformation. The question whether these changes in RV contraction patterns might be useful as surrogates of early RV dysfunction and represent additional criteria for medical/surgical intervention, will require further prospective research in patients with specific pathology.

### *Contributions of the current study*

Although Lakatos et al. have previously described the contribution of non-longitudinal components of RV contraction in 300 healthy volunteers from a single European and Asian institutions<sup>12</sup>, our study broadens this analysis to the larger, multicentric and multiethnic WASE cohort, yielding a more statistically sound assessment of the influence of sex, age, and race on these parameters. The LLN and ULN values for 3D RVEDVi and RV EF provided by our study are similar to those reported by the two largest studies of 3DE normative values of this chamber, including Maffessanti et al.<sup>32</sup> and Addetia et al.<sup>33</sup>.

However, current clinical practice lacks RV functional parameters that represent the non-longitudinal shortening of this chamber. The results of our study expands the evidence provided by previous reports, showing that REF and AEF have similar contributions to that of LEF to global RV contraction, and that these components should not be neglected when evaluating the RV function<sup>12</sup>. Importantly, we were able to show that the RV contraction pattern is independently associated with age, sex, and race highlighting that the established changes across the different subgroups are not just due to anthropometric (BSA) or basic hemodynamic (heart rate, blood pressure) differences. The magnitude of longitudinal and anteroposterior shortenings are coupled with LV function; however, radial shortening is not. This observation is in line with the findings of Surkova et al. who showed that these mechanical directions are deteriorating in parallel with LV systolic dysfunction<sup>29</sup>.

Our findings agree with those reported in the 2D RV systolic function analysis on the WASE population, which have shown that RV dimensions were larger in men and 2D RV functional parameters were larger in women<sup>34</sup>. Age-related changes in these 2D parameters were not uniform<sup>34</sup> and previous studies using 3DE assessment of RV systolic function have also noted that age is weakly correlated with RVEF<sup>32</sup>. Notably, we were able to identify an age-related reduction in the longitudinal components of RV contraction in both sexes and a characteristic increase in radial RV contraction in women with age. These observations might be related to an age-related increase in pulmonary pressures and consequent changes in RV myofiber architecture. A preserved RV EF does not preclude the presence of changes in the RV contraction patterns, and the role of REF as an early marker of elevated pulmonary pressures has been proposed<sup>16</sup>. Muraru et al. have identified LV GLS and PASP as independent predictors of RV longitudinal performance, suggesting that the assessment of the RV adaptation to increased afterload should not be limited to the RV free wall<sup>35</sup>. Accordingly, our findings

support the concept that the evaluation of RV systolic function in individuals > 65 years should not be restricted to its longitudinal motion.

The use of 3DE allowed to show the presence of higher longitudinal and anteroposterior contraction as well as lower radial contributions to global RVEF in Asian population<sup>12</sup>. Although noticeable differences in 3D RV volumes and EF across ethnic groups have been recently identified<sup>33</sup>, to the best of our knowledge, this is the first study describing distinctive RV contractile patterns in black and white men, which had been previously overlooked when only using 2DE parameters<sup>34</sup>. Our findings contribute to expand the understanding of race-related differences in echocardiographic measurements.

### **LIMITATIONS**

The feasibility of performing a 3D RV analysis in the WASE cohort was slightly above 50%<sup>33</sup>. It must be acknowledged that 3DE acquisitions of the RV are technically demanding, requiring a high level of sonographer expertise. Although, patients with poor acoustic windows, arrhythmias, large body habitus, obstructive pulmonary disease, or severe chamber dilation are usually excluded from research protocols, these are frequently encountered in daily clinical practice. Low accuracy of automated measurements in right ventricles of different geometry and image quality was also described and should be considered<sup>36,37</sup>. Furthermore, in our study there was a relative under-representation of black subjects and individuals from the older age group.

### **CONCLUSION**

Mechanical adaptations of the right ventricle are complex and are often not restricted to its longitudinal components. The clinical and prognostic utility of the different components of 3DE RV function has been previously reported. Our results reassure this concept through the demonstration of the physiological equivalence of longitudinal and non-longitudinal components of RV contraction and the presence sex, age, and race - related differences in RV contraction patterns. These findings might be useful in considering both physiological and pathological states involving the right ventricle.

## References

1. Antoni ML, Scherptong RW, Atary JZ, Boersma E, Holman ER, van der Wall EE, Schaliij MJ and Bax JJ. Prognostic value of right ventricular function in patients after acute myocardial infarction treated with primary percutaneous coronary intervention. *Circ Cardiovasc Imaging*. 2010;3:264-71.
2. Carluccio E, Biagioli P, Alunni G, Murrone A, Zuchi C, Coiro S, Riccini C, Mengoni A, D'Antonio A and Ambrosio G. Prognostic Value of Right Ventricular Dysfunction in Heart Failure With Reduced Ejection Fraction: Superiority of Longitudinal Strain Over Tricuspid Annular Plane Systolic Excursion. *Circ Cardiovasc Imaging*. 2018;11:e006894.
3. Amsallem M, Sweatt AJ, Aymami MC, Kuznetsova T, Selej M, Lu H, Mercier O, Fadel E, Schnittger I, McConnell MV, Rabinovitch M, Zamanian RT and Haddad F. Right Heart End-Systolic Remodeling Index Strongly Predicts Outcomes in Pulmonary Arterial Hypertension: Comparison With Validated Models. *Circ Cardiovasc Imaging*. 2017;10.
4. Spiewak M, Malek LA, Petryka J, Mazurkiewicz L, Werys K, Biernacka EK, Kowalski M, Hoffman P, Demkow M, Misko J and Ruzylo W. Repaired tetralogy of Fallot: ratio of right ventricular volume to left ventricular volume as a marker of right ventricular dilatation. *Radiology*. 2012;265:78-86.
5. Ho SY and Nihoyannopoulos P. Anatomy, echocardiography, and normal right ventricular dimensions. *Heart*. 2006;92 Suppl 1:i2-13.
6. Lakatos B, Toser Z, Tokodi M, Doronina A, Kosztin A, Muraru D, Badano LP, Kovacs A and Merkely B. Quantification of the relative contribution of the different right ventricular wall motion components to right ventricular ejection fraction: the ReVISION method. *Cardiovasc Ultrasound*. 2017;15:8.
7. Asch FM, Banchs J, Price R, Rigolin V, Thomas JD, Weissman NJ and Lang RM. Need for a Global Definition of Normative Echo Values-Rationale and Design of the World Alliance of Societies of Echocardiography Normal Values Study (WASE). *J Am Soc Echocardiogr*. 2019;32:157-162 e2.
8. Asch FM, Miyoshi T, Addetia K, Citro R, Daimon M, Desale S, Fajardo PG, Kasliwal RR, Kirkpatrick JN, Monaghan MJ, Muraru D, Ogunyankin KO, Park SW, Ronderos RE, Sadeghpour A, Scalia GM, Takeuchi M, Tsang W, Tucay ES, Tude Rodrigues AC, Vivekanandan A, Zhang Y, Blitz A, Lang RM and Investigators W. Similarities and Differences in Left Ventricular Size and Function among Races and Nationalities: Results of the World Alliance Societies of Echocardiography Normal Values Study. *J Am Soc Echocardiogr*. 2019;32:1396-1406 e2.
9. Lang RM, Badano LP, Mor-Avi V, Afilalo J, Armstrong A, Ernande L, Flachskampf FA, Foster E, Goldstein SA, Kuznetsova T, Lancellotti P, Muraru D, Picard MH, Rietzschel ER, Rudski L, Spencer KT, Tsang W and Voigt JU. Recommendations for cardiac chamber quantification by echocardiography in adults: an update from the American Society of Echocardiography and the European Association of Cardiovascular Imaging. *J Am Soc Echocardiogr*. 2015;28:1-39 e14.
10. Medvedofsky D, Addetia K, Patel AR, Sedlmeier A, Baumann R, Mor-Avi V and Lang RM. Novel Approach to Three-Dimensional Echocardiographic Quantification of Right Ventricular Volumes and Function from Focused Views. *J Am Soc Echocardiogr*. 2015;28:1222-31.
11. Tokodi M, Staub L, Budai A, Lakatos BK, Csakvari M, Suhai FI, Szabo L, Fabian A, Vago H, Toser Z, Merkely B and Kovacs A. Partitioning the Right Ventricle Into 15 Segments and Decomposing Its Motion Using 3D Echocardiography-Based Models: The Updated ReVISION Method. *Front Cardiovasc Med*. 2021;8:622118.
12. Lakatos BK, Nabeshima Y, Tokodi M, Nagata Y, Toser Z, Otani K, Kitano T, Fabian A, Ujvari A, Boros AM, Merkely B, Kovacs A and Takeuchi M. Importance of Nonlongitudinal Motion Components in Right Ventricular Function: Three-Dimensional Echocardiographic Study in Healthy Volunteers. *J Am Soc Echocardiogr*. 2020;33:995-1005 e1.

13. Buckberg G, Mahajan A, Saleh S, Hoffman JI and Coghlan C. Structure and function relationships of the helical ventricular myocardial band. *J Thorac Cardiovasc Surg.* 2008;136:578-89, 589 e1-11.
14. Muraru D, Haugaa K, Donal E, Stankovic I, Voigt JU, Petersen SE, Popescu BA and Marwick T. Right ventricular longitudinal strain in the clinical routine: a state-of-the-art review. *Eur Heart J Cardiovasc Imaging.* 2022;23:898-912.
15. D'Andrea A, Limongelli G, Baldini L, Verrengia M, Carbone A, Di Palma E, Vastarella R, Masarone D, Tagliamonte G, Riegler L, Calabro R, Russo MG, Bossone E and Pacileo G. Exercise speckle-tracking strain imaging demonstrates impaired right ventricular contractile reserve in hypertrophic cardiomyopathy. *Int J Cardiol.* 2017;227:209-216.
16. Kind T, Mauritz GJ, Marcus JT, van de Veerdonk M, Westerhof N and Vonk-Noordegraaf A. Right ventricular ejection fraction is better reflected by transverse rather than longitudinal wall motion in pulmonary hypertension. *J Cardiovasc Magn Reson.* 2010;12:35.
17. Tamborini G, Muratori M, Brusoni D, Celeste F, Maffessanti F, Caiani EG, Alamanni F and Pepi M. Is right ventricular systolic function reduced after cardiac surgery? A two- and three-dimensional echocardiographic study. *Eur J Echocardiogr.* 2009;10:630-4.
18. Li Y, Zhang L, Gao Y, Wan X, Xiao Q, Zhang Y, Sun W, Xie Y, Zeng Q, Chen Y, Jin Q, Wu W, Yang Y, Wang J, Lv Q, Shi H and Xie M. Comprehensive Assessment of Right Ventricular Function by Three-Dimensional Speckle-Tracking Echocardiography: Comparisons with Cardiac Magnetic Resonance Imaging. *J Am Soc Echocardiogr.* 2021;34:472-482.
19. Nagata Y, Wu VC, Kado Y, Otani K, Lin FC, Otsuji Y, Negishi K and Takeuchi M. Prognostic Value of Right Ventricular Ejection Fraction Assessed by Transthoracic 3D Echocardiography. *Circ Cardiovasc Imaging.* 2017;10.
20. Muraru D, Badano LP, Nagata Y, Surkova E, Nabeshima Y, Genovese D, Otsuji Y, Guida V, Azzolina D, Palermo C and Takeuchi M. Development and prognostic validation of partition values to grade right ventricular dysfunction severity using 3D echocardiography. *Eur Heart J Cardiovasc Imaging.* 2020;21:10-21.
21. Kitano T, Kovacs A, Nabeshima Y, Tokodi M, Fabian A, Lakatos BK and Takeuchi M. Prognostic Value of Right Ventricular Strains Using Novel Three-Dimensional Analytical Software in Patients With Cardiac Disease. *Front Cardiovasc Med.* 2022;9:837584.
22. Tolvaj M, Fabian A, Tokodi M, Lakatos B, Assabiny A, Ladanyi Z, Shiida K, Ferencz A, Schwertner W, Veres B, Kosztin A, Szijarto A, Sax B, Merkely B and Kovacs A. There is more than just longitudinal strain: Prognostic significance of biventricular circumferential mechanics. *Front Cardiovasc Med.* 2023;10:1082725.
23. Mocerri P, Duchateau N, Gillon S, Jaunay L, Baudouy D, Squara F, Ferrari E and Sermesant M. Three-dimensional right ventricular shape and strain in congenital heart disease patients with right ventricular chronic volume loading. *Eur Heart J Cardiovasc Imaging.* 2021;22:1174-1181.
24. Tokodi M, Nemeth E, Lakatos BK, Kispal E, Toser Z, Staub L, Racz K, Soltesz A, Szigeti S, Varga T, Gal J, Merkely B and Kovacs A. Right ventricular mechanical pattern in patients undergoing mitral valve surgery: a predictor of post-operative dysfunction? *ESC Heart Fail.* 2020;7:1246-1256.
25. Kovacs A, Lakatos B, Tokodi M and Merkely B. Right ventricular mechanical pattern in health and disease: beyond longitudinal shortening. *Heart Fail Rev.* 2019;24:511-520.
26. Lakatos BK, Tokodi M, Assabiny A, Toser Z, Kosztin A, Doronina A, Racz K, Koritsanszky KB, Berzsenyi V, Nemeth E, Sax B, Kovacs A and Merkely B. Dominance of free wall radial motion in global right ventricular function of heart transplant recipients. *Clin Transplant.* 2018;32:e13192.

27. Surkova E, Kovacs A, Lakatos BK, Tokodi M, Fabian A, West C, Senior R and Li W. Contraction patterns of the systemic right ventricle: a three-dimensional echocardiography study. *Eur Heart J Cardiovasc Imaging*. 2022;23:1654-1662.
28. Fabian A, Ujvari A, Tokodi M, Lakatos BK, Kiss O, Babity M, Zamodics M, Sydo N, Csulak E, Vago H, Szabo L, Kiss AR, Szucs A, Hizoh I, Merkely B and Kovacs A. Biventricular mechanical pattern of the athlete's heart: comprehensive characterization using three-dimensional echocardiography. *Eur J Prev Cardiol*. 2022;29:1594-1604.
29. Surkova E, Kovacs A, Tokodi M, Lakatos BK, Merkely B, Muraru D, Ruocco A, Parati G and Badano LP. Contraction Patterns of the Right Ventricle Associated with Different Degrees of Left Ventricular Systolic Dysfunction. *Circ Cardiovasc Imaging*. 2021;14:e012774.
30. Sayour AA, Tokodi M, Celeng C, Takx RAP, Fabian A, Lakatos BK, Friebel R, Surkova E, Merkely B and Kovacs A. Association of Right Ventricular Functional Parameters With Adverse Cardiopulmonary Outcomes: A Meta-analysis. *J Am Soc Echocardiogr*. 2023.
31. Baumgartner H, Falk V, Bax JJ, De Bonis M, Hamm C, Holm PJ, Jung B, Lancellotti P, Lansac E, Rodriguez Munoz D, Rosenhek R, Sjogren J, Tornos Mas P, Vahanian A, Walther T, Wendler O, Windecker S, Zamorano JL and Group ESCSD. 2017 ESC/EACTS Guidelines for the management of valvular heart disease. *Eur Heart J*. 2017;38:2739-2791.
32. Maffessanti F, Muraru D, Esposito R, Gripari P, Ermacora D, Santoro C, Tamborini G, Galderisi M, Pepi M and Badano LP. Age-, body size-, and sex-specific reference values for right ventricular volumes and ejection fraction by three-dimensional echocardiography: a multicenter echocardiographic study in 507 healthy volunteers. *Circ Cardiovasc Imaging*. 2013;6:700-10.
33. Addetia K, Miyoshi T, Amuthan V, Citro R, Daimon M, Gutierrez Fajardo P, Kasliwal RR, Kirkpatrick JN, Monaghan MJ, Muraru D, Ogunyankin KO, Park SW, Ronderos RE, Sadeghpour A, Scalia GM, Takeuchi M, Tsang W, Tucay ES, Tude Rodrigues AC, Zhang Y, Singulane CC, Hitschrich N, Blankenhagen M, Degel M, Schreckenber M, Mor-Avi V, Asch FM and Lang RM. Normal Values of 3D Right Ventricular Size and Function Measurements: Results of the World Alliance of Societies of Echocardiography Study. *J Am Soc Echocardiogr*. 2023;36:(in press).
34. Addetia K, Miyoshi T, Citro R, Daimon M, Gutierrez Fajardo P, Kasliwal RR, Kirkpatrick JN, Monaghan MJ, Muraru D, Ogunyankin KO, Park SW, Ronderos RE, Sadeghpour A, Scalia GM, Takeuchi M, Tsang W, Tucay ES, Tude Rodrigues AC, Vivekanandan A, Zhang Y, Schreckenber M, Mor-Avi V, Asch FM, Lang RM and Investigators W. Two-Dimensional Echocardiographic Right Ventricular Size and Systolic Function Measurements Stratified by Sex, Age, and Ethnicity: Results of the World Alliance of Societies of Echocardiography Study. *J Am Soc Echocardiogr*. 2021;34:1148-1157 e1.
35. Muraru D, Onciul S, Peluso D, Soriani N, Cucchini U, Aruta P, Romeo G, Cavalli G, Iliceto S and Badano LP. Sex- and Method-Specific Reference Values for Right Ventricular Strain by 2-Dimensional Speckle-Tracking Echocardiography. *Circ Cardiovasc Imaging*. 2016;9:e003866.
36. Ostenfeld E, Carlsson M, Shahgaldi K, Roijer A and Holm J. Manual correction of semi-automatic three-dimensional echocardiography is needed for right ventricular assessment in adults; validation with cardiac magnetic resonance. *Cardiovasc Ultrasound*. 2012;10:1.
37. Muraru D, Badano LP, Piccoli G, Gianfagna P, Del Mestre L, Ermacora D and Proclemer A. Validation of a novel automated border-detection algorithm for rapid and accurate quantitation of left ventricular volumes based on three-dimensional echocardiography. *Eur J Echocardiogr*. 2010;11:359-68.



### **\* WASE Investigators**

- **Argentina:** *Aldo D. Prado*, Centro Privado de Cardiología, Tucumán, Argentina; *Eduardo Filipini*, Universidad Nacional de la Plata, Buenos Aires, Argentina; *Ricardo E. Ronderos*, Instituto Cardiovascular de Buenos Aires, Buenos Aires, Argentina
- **Australia:** *Agatha Kwon and Samantha Hoschke-Edwards*, Heart Care Partners, Queensland, Australia; *Gregory M. Scalia*, Genesis Care, Brisbane, Australia
- **Brazil:** *Tania Regina Afonso and Ana Clara Tude Rodridugues*, Albert Einstein Hospital, Sao Paulo, Brazil
- **Canada:** *Babitha Thampinathan, Maala Sooriyakanthan and Wendy Tsang*, Toronto General Hospital, University of Toronto, Canada
- **China:** *Mei Zhang, Yingbin Wang and Yu Zhang*, Qilu Hospital of Shandong University, Jinan, China; *Tiangang Zhu and Zhilong Wang*, Peking University People's Hospital, Beijing, China; *Lixue Yin and Shuang Li*, Sichuan Provincial People's Hospital, Sichuan, China
- **India:** *R. Alagesan*, Madras Medical College, Chennai, India; *S. Balasubramanian*, Madurai Medical College, Madurai, India; *R.V.A. Ananth and Vivekanandan Amuthan*, Jeyalakshmi Heart Center, Madurai, India; *Manish Bansal*, Medanta Heart Institute, Medanta, Haryana, India; *Ravi R. Kasliwal*, Medanta Heart Institute, Gurgaon, Haryana, India
- **Iran:** *Azin Alizadehasl*, Rajaie Cardiovascular Medical Center, IUMS, Tehran, Iran; *Anita Sadeghpour*, Rajaie Cardiovascular Medical and Research Center, Tehran, Islamic Republic of Iran
- **Italy:** *Luigi Badano and Denisa Muraru*, University of Milano-Bicocca, and Istituto Auxologico Italiano, IRCCS, Milan, Italy; *Eduardo Bossone, Davide Di Vece, Rodolfo Citro and Michele Bellino*, University of Salerno, Salerno, Italy
- **Japan:** *Tomoko Nakao, Takayuki Kawata, Megumi Hirokawa, Naoko Sawada and Masao Daimon*, The University of Tokyo, Tokyo, Japan; *Yousuke Nabeshima and Masaki Takeuchi*, University of Occupational and Environmental Health, Kitakyushu, Japan
- **Republic of Korea:** *Hye Rim Yun, Seung Woo Park and Ji-won Hwang*, Samsung Medical Center, Seoul, Republic of Korea
- **Mexico:** *Pedro Gutierrez Fajardo*, Hospitales Mac Bernardette, Guadalajara, Mexico
- **Nigeria:** *Kofo O. Ogunyankin*, First Cardiology Consultants Hospital, Lagos, Nigeria
- **Phillipines:** *Edwin S. Tucay*, Philippine Heart Center, Quezon City, Philippines
- **United Kingdom:** *Mark J. Monaghan*, King's College Hospital, London, United Kingdom
- **United States:** *James N. Kirkpatrick*, University of Washington, Seattle, WA; *Tatsuya Miyoshi*, MedStar Health Research Institute, Washington, DC

**Figure 1.** Right Ventricular Contraction Decomposition Workflow

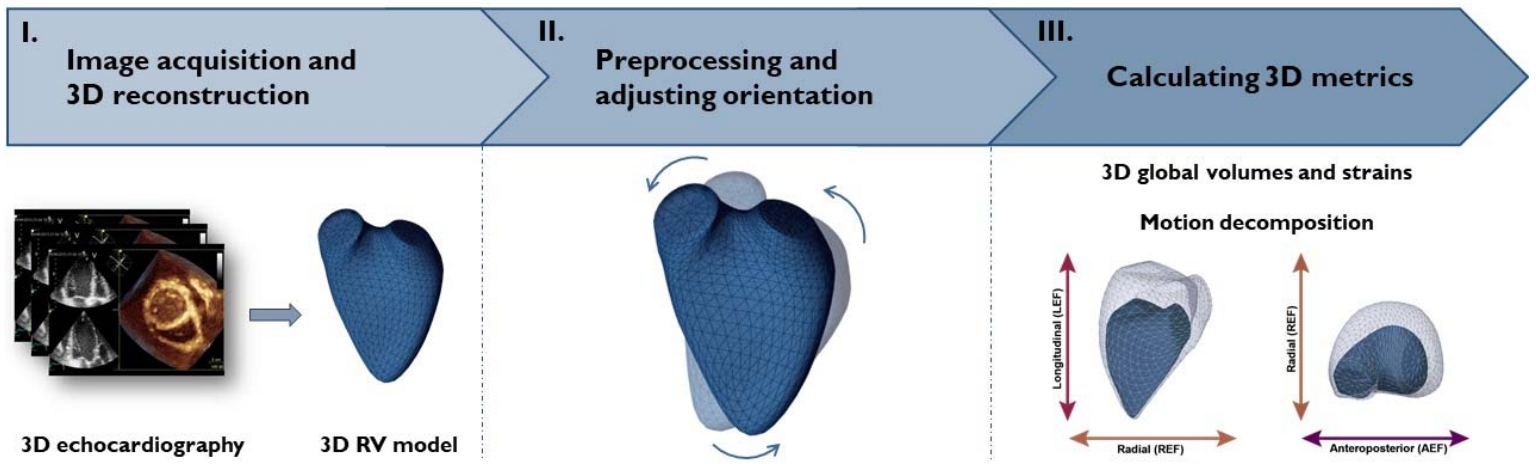

**Table 1.** Basic anthropometric and demographic data in the total study population and separately in men and women.

|                           | All subjects<br>n=1043 | Men<br>n=533 | Women<br>n=510 | P-value          |
|---------------------------|------------------------|--------------|----------------|------------------|
| Age (years)               | 46.8±16.6              | 46.2±16.4    | 47.4±16.8      | 0.245            |
| Heart rate (bpm)          | 64.6±10.5              | 63.5±10.3    | 65.7±10.5      | <b>0.001</b>     |
| BSA, m <sup>2</sup>       | 1.78±0.21              | 1.89±0.19    | 1.66±0.17      | <b>&lt;0.001</b> |
| <b>Race</b>               |                        |              |                |                  |
| • Asian                   | 375 (36%)              | 206 (39%)    | 169 (33%)      | 0.064            |
| • Black                   | 142 (14%)              | 69 (13%)     | 73 (14%)       | 0.519            |
| • White                   | 488 (47%)              | 235 (44%)    | 253 (50%)      | 0.074            |
| • Other (Mixed and other) | 38 (4%)                | 23 (4%)      | 15 (3%)        | 0.236            |

ml: milliliters, bpm: beats per minute

**Table 2.** Upper and lower limits of normality for the novel RV parameters in men and women

|              | All subjects<br>n=1043 | Men<br>n=533   | Women<br>n=510 |
|--------------|------------------------|----------------|----------------|
|              | LLN to ULN             | LLN to ULN     | LLN to ULN     |
| RV EDVi (ml) | 43.7 to 123.1          | 47.9 to 132.5  | 41.7 to 110.6  |
| RV EF (%)    | 44.7 to 67.1           | 44.1 to 65.7   | 45.8 to 68.6   |
| RV GCS       | -13.4 to -31.3         | -13.9 to -30.9 | -12.8 to -31.6 |
| RV GLS       | -13.2 to -27.4         | -13.4 to -26.9 | -12.5 to -27.9 |
| RV GAS       | -28.4 to -48.9         | -28.5 to -47.6 | -28.4 to -49.6 |
| REF (%)      | 15.3 to 42.7           | 15.0 to 41.8   | 15.7 to 43.1   |
| REF/RVEF     | 0.30 to 0.73           | 0.29 to 0.73   | 0.30 to 0.73   |
| AEF (%)      | 14.1 to 37.2           | 13.7 to 35.3   | 14.2 to 37.8   |
| AEF/RVEF     | 0.28 to 0.61           | 0.28 to 0.60   | 0.28 to 0.61   |
| LEF (%)      | 11.1 to 33.4           | 11.7 to 31.7   | 11.0 to 35.0   |
| LEF/RVEF     | 0.22 to 0.56           | 0.23 to 0.55   | 0.22 to 0.57   |

ml: milliliters, LLN: lower limit normal (2.5th percentile), ULN: upper limit normal (97.5th percentile), RV EDVi: right ventricular end-diastolic volume index, RV EF: right ventricular ejection fraction, RV GCS: right ventricular global circumferential strain, RV GLS: right ventricular global longitudinal strain, RV GAS: right ventricular global area strain, REF: radial ejection fraction, AEF: anteroposterior ejection fraction, LEF: longitudinal ejection fraction

**Table 3.** Sex-related differences in 3D RV morphological and functional parameters

|                     | All subjects<br>n=1043 | Men<br>n=533 | Women<br>n=510 | P- value         |
|---------------------|------------------------|--------------|----------------|------------------|
| <b>RV EDVi (ml)</b> | 76.4 ± 20.2            | 82.2 ± 21.4  | 70.5 ± 16.9    | <b>&lt;0.001</b> |
| <b>RV EF (%)</b>    | 55.5 ± 5.8             | 54.5 ± 5.4   | 56.5 ± 6.0     | <b>&lt;0.001</b> |
| <b>RV GCS</b>       | -22.1 ± 4.5            | -21.9 ± 4.3  | -22.3 ± 4.8    | 0.175            |
| <b>RV GLS</b>       | -19.7 ± 3.7            | -19.4 ± 3.5  | -20.1 ± 3.9    | <b>0.008</b>     |
| <b>RV GAS</b>       | -38.0 ± 5.2            | -37.3 ± 4.8  | -38.6 ± 5.6    | <b>&lt;0.001</b> |
| <b>REF (%)</b>      | 29.0 ± 7.0             | 28.3 ± 6.7   | 29.7 ± 7.1     | <b>0.001</b>     |
| <b>REF/RVEF</b>     | 0.52 ± 0.11            | 0.52 ± 0.11  | 0.53 ± 0.11    | 0.284            |
| <b>AEF (%)</b>      | 25.4 ± 5.9             | 24.7 ± 5.7   | 26.1 ± 6.1     | <b>&lt;0.001</b> |
| <b>AEF/RVEF</b>     | 0.45 ± 0.08            | 0.45 ± 0.08  | 0.46 ± 0.08    | 0.188            |
| <b>LEF (%)</b>      | 21.6 ± 5.7             | 21.0 ± 5.2   | 22.3 ± 6.0     | <b>&lt;0.001</b> |
| <b>LEF/RVEF</b>     | 0.39 ± 0.09            | 0.38 ± 0.08  | 0.39 ± 0.09    | 0.144            |

*ml: milliliters, RV EDVi: right ventricular end-diastolic volume index, RV EF: right ventricular ejection fraction, RV GCS: right ventricular global circumferential strain, RV GLS: right ventricular global longitudinal strain, RV GAS: right ventricular global area strain, REF: radial ejection fraction, AEF: anteroposterior ejection fraction, LEF: longitudinal ejection fraction*

|              | Men (n=533)            |                        |                          |                  | Women (n=510)            |                          |                          |                  |
|--------------|------------------------|------------------------|--------------------------|------------------|--------------------------|--------------------------|--------------------------|------------------|
|              | 18-40 y<br>n=234       | 41-65 y<br>n=194       | >65 y<br>n=105           | p-<br>ANOVA      | 18-40 y<br>n=199         | 41-65 y<br>n=197         | >65 y<br>n=114           | p-<br>ANOVA      |
| RV EDVi (ml) | 83.4±19.4              | 80.6±21.9              | 82.3±24.3                | 0.364            | 71.1±17.0                | 70.0±16.5                | 70.0±17.3                | 0.783            |
| RV EF (%)    | 54.7±5.5               | 54.7±5.4               | 53.5±5.1                 | 0.094            | 56.9±5.9 <sup>c</sup>    | 57.1±5.9 <sup>c</sup>    | 55.0±6.1 <sup>a,b</sup>  | <b>0.005</b>     |
| RV GCS       | -22.0±4.4              | -22.0±4.6              | -21.8±3.5                | 0.914            | -22.4±5.0                | -22.5±4.7                | -21.8±4.6                | 0.281            |
| RV GLS       | -20.0±3.4 <sup>c</sup> | -19.5±3.6 <sup>c</sup> | -18.2±3.4 <sup>a,b</sup> | <b>&lt;0.001</b> | -20.9±3.9 <sup>b,c</sup> | -20.1±3.8 <sup>a,c</sup> | -18.6±3.7 <sup>a,b</sup> | <b>&lt;0.001</b> |
| RV GAS       | -37.7±4.8 <sup>c</sup> | -37.6±4.9 <sup>c</sup> | -36.0±4.2 <sup>a,b</sup> | <b>0.008</b>     | -39.4±5.6 <sup>c</sup>   | -38.9±5.4 <sup>c</sup>   | -36.8±5.5 <sup>a,b</sup> | <b>&lt;0.001</b> |
| REF (%)      | 28.1±6.8               | 28.5±7.0               | 28.6±6.3                 | 0.724            | 28.7±7.2 <sup>b,c</sup>  | 30.5±7.2 <sup>a</sup>    | 30.4±6.6 <sup>a</sup>    | <b>0.021</b>     |
| REF/RVEF     | 0.51±0.11              | 0.52±0.11              | 0.53±0.10                | 0.233            | 0.50±0.11 <sup>b,c</sup> | 0.53±0.11 <sup>a</sup>   | 0.55±0.1 <sup>a</sup>    | <b>&lt;0.001</b> |
| AEF (%)      | 24.6±5.6               | 25.0±5.8               | 24.4±5.6                 | 0.690            | 26.3±6.2                 | 26.5±5.9                 | 25.0±6.2                 | 0.098            |
| AEF/RVEF     | 0.45±0.1               | 0.45±0.09              | 0.45±0.1                 | 0.699            | 0.46±0.09                | 0.46±0.1                 | 0.45±0.1                 | 0.668            |
| LEF (%)      | 21.8±5.1 <sup>c</sup>  | 21.2±5.3 <sup>c</sup>  | 18.9±4.9 <sup>a,b</sup>  | <b>&lt;0.001</b> | 23.5±6.1 <sup>c</sup>    | 22.5±5.5 <sup>c</sup>    | 19.8±6.1 <sup>a,b</sup>  | <b>&lt;0.001</b> |
| LEF/RVEF     | 0.40±0.1 <sup>c</sup>  | 0.39±0.1 <sup>c</sup>  | 0.35±0.1 <sup>a,b</sup>  | <b>&lt;0.001</b> | 0.41±0.09 <sup>b,c</sup> | 0.39±0.1 <sup>a,c</sup>  | 0.36±0.1 <sup>a,b</sup>  | <b>&lt;0.001</b> |

**Table 4.** Age-related differences in 3D RV morphological and functional parameters

<sup>a</sup>  $P < 0.05$  vs. 18–40-year age group

<sup>b</sup>  $P < 0.05$  vs. 41–65-year age group

<sup>c</sup>  $P < 0.05$  vs. > 65 years age group

*y*: years, *ml*: milliliters, ANOVA: analysis of variance, RV EDVi: right ventricular end-diastolic volume index, RV EF: right ventricular ejection fraction, RV GCS: right ventricular global circumferential strain, RV GLS: right ventricular global longitudinal strain, RV GAS: right ventricular global area strain, REF: radial ejection fraction, AEF: anteroposterior ejection fraction, LEF: longitudinal ejection fraction

|                     | Men (n=510)              |                          |                          |                  | Women (n=495)            |                          |                        |                  |
|---------------------|--------------------------|--------------------------|--------------------------|------------------|--------------------------|--------------------------|------------------------|------------------|
|                     | White<br>n=235           | Black<br>n=69            | Asian<br>n=206           | p-<br>ANOVA      | White<br>n=253           | Black<br>n=73            | Asian<br>n=169         | p-<br>ANOVA      |
| <b>RV EDVi (ml)</b> | 85.7±21.6 <sup>b,c</sup> | 95.5±23.7 <sup>a,c</sup> | 74.4±17 <sup>a,b</sup>   | <b>&lt;0.001</b> | 70.9±16.7 <sup>b,c</sup> | 81.2±16.8 <sup>a,c</sup> | 65.7±16 <sup>a,b</sup> | <b>&lt;0.001</b> |
| <b>RV EF (%)</b>    | 55.4±5.9 <sup>b,c</sup>  | 52.4±4.5 <sup>a,c</sup>  | 54.2±5.0 <sup>a,b</sup>  | <b>&lt;0.001</b> | 57.2±6.1 <sup>b</sup>    | 54.9±5.1 <sup>a</sup>    | 56.2±6.1               | <b>0.010</b>     |
| <b>RV GCS</b>       | -22.4±4.4 <sup>c</sup>   | -21.4±4.1                | -21.5±4.2 <sup>a</sup>   | <b>0.034</b>     | -22.5±4.7                | -22.1±4.6                | -22.1±5.1              | 0.627            |
| <b>RV GLS</b>       | -20.2±3.5 <sup>b,c</sup> | -18.2±3.3 <sup>a</sup>   | -19.1±3.5 <sup>a</sup>   | <b>&lt;0.001</b> | -20.1±4.0                | -19.2±3.8                | -20.3±3.9              | 0.119            |
| <b>RV GAS</b>       | -38.3±5.0 <sup>b,c</sup> | -35.2±4.2 <sup>a,c</sup> | -37.0±4.5 <sup>a,b</sup> | <b>&lt;0.001</b> | -38.7±5.6 <sup>b</sup>   | -37.1±5.0 <sup>a,c</sup> | -39.0±5.8 <sup>b</sup> | <b>0.036</b>     |
| <b>REF (%)</b>      | 28.1±7.1                 | 29.1±5.7                 | 28.3±6.7                 | 0.598            | 30.3±7.5                 | 29.3±6.4                 | 29.3±7.0               | 0.261            |
| <b>REF/RVEF</b>     | 0.50±0.11 <sup>b</sup>   | 0.55±0.09 <sup>a,c</sup> | 0.52±0.11 <sup>b</sup>   | <b>0.004</b>     | 0.53±0.11                | 0.53±0.10                | 0.52±0.11              | 0.656            |
| <b>AEF (%)</b>      | 25.5±5.8 <sup>b</sup>    | 22.5±4.9 <sup>a,c</sup>  | 24.6±5.7 <sup>b</sup>    | <b>0.001</b>     | 26.3±6.1                 | 24.9±4.8                 | 26.2±6.7               | 0.221            |
| <b>AEF/RVEF</b>     | 0.46±0.08 <sup>b</sup>   | 0.43±0.08 <sup>a</sup>   | 0.45±0.9                 | <b>0.046</b>     | 0.46±0.08                | 0.45±0.07                | 0.46±0.09              | 0.706            |
| <b>LEF (%)</b>      | 22.3±5.2 <sup>b,c</sup>  | 18.0±4.8 <sup>a,c</sup>  | 20.6±4.9 <sup>a,b</sup>  | <b>&lt;0.001</b> | 22.8±6.1 <sup>b</sup>    | 20.3±5.7 <sup>a,c</sup>  | 22.3±6.1 <sup>b</sup>  | <b>0.011</b>     |
| <b>LEF/RVEF</b>     | 0.40±0.08 <sup>b,c</sup> | 0.34±0.08 <sup>a,c</sup> | 0.38±0.1 <sup>a,b</sup>  | <b>&lt;0.001</b> | 0.40±0.09                | 0.37±0.09                | 0.39±0.09              | 0.087            |

**Table 5.** Race-related differences in 3D RV morphological and functional parameters

<sup>a</sup>  $P < 0.05$  vs. 18–40-year age group

<sup>b</sup>  $P < 0.05$  vs. 41–65-year age group

<sup>c</sup>  $P < 0.05$  vs. > 65 years age group

*ml: milliliters, ANOVA: analysis of variance, RV EDVi: right ventricular end-diastolic volume index, RV EF: right ventricular ejection fraction, RV GCS: right ventricular global circumferential strain, RV GLS: right ventricular global longitudinal strain, RV GAS: right ventricular global area strain, REF: radial ejection fraction, AEF: anteroposterior ejection fraction, LEF: longitudinal ejection fraction*
